# Supplementary material for: Double stimuli-responsive azobenzene containing poly(2-oxazoline)s: synthesis, light, and temperature-responsive behavior
Source: Royal Society of Chemistry journal article supplement (doi:10.1039/d3py00582h), 2023-01-01
Supplement: d3py00582h1.pdf [file d3py00582h1.pdf]

## Supporting information

### DOUBLE STIMULI-RESPONSIVE AZOBENZENE CONTAINING POLY(2-OXAZOLINE)S: SYNTHESIS, LIGHT, AND TEMPERATURE-RESPONSIVE BEHAVIOR

Shu Wang<sup>a,b</sup>, Purushottam Poudel<sup>a,b</sup>, Felix H. Schacher<sup>a,b,c</sup>, Leonid I. Kaberov<sup>a,b\*</sup>

*a* Institute of Organic Chemistry and Macromolecular Chemistry (IOMC), Friedrich Schiller University Jena, Humboldtstrasse 10, 07743 Jena (Germany)

*b* Jena Center for Soft Matter (JCSM), Friedrich Schiller University Jena, Philosophenweg 7, 07743 Jena (Germany)

*c* Center for Energy and Environmental Chemistry (CEEC), Friedrich-Schiller-University Jena Philosophenweg 7, 07743 Jena (Germany)

E-mail: [kaberovleonid@gmail.com](mailto:kaberovleonid@gmail.com)

**Table S1.** Setups of three series of polymers.

|                       | EtOx            | MeOTos                | ACN     | Terminator (KOH) | Time   | $M_n$ (g/mol) | $\bar{D}$ |
|-----------------------|-----------------|-----------------------|---------|------------------|--------|---------------|-----------|
| PEtOx <sup>6</sup>    | 8 mL, 79.4 mmol | 120 $\mu$ L, 0.8 mmol | 11.8 mL | 3.2 mmol         | 16 min | 6000          | 1.39      |
| PEtOx <sup>15.1</sup> | 8 mL, 79.4 mmol | 120 $\mu$ L, 0.8 mmol | 11.8 mL | 3.2 mmol         | 19 min | 15100         | 1.11      |
| PEtOx <sup>17.5</sup> | 8 mL, 79.4 mmol | 81 $\mu$ L, 0.5 mmol  | 11.8 mL | 2.1 mmol         | 29 min | 17500         | 1.22      |

**Table S2.**  $M_n$  and  $\bar{D}$  of hydrolyzed polymers.

| Hydrolyzed polymers                                               | Hydrolysis time, min | $M_n$ (g/mol) | $\bar{D}$ | Hydrolysis degree |
|-------------------------------------------------------------------|----------------------|---------------|-----------|-------------------|
| <b>P(EtOx<sub>0.94</sub>-co-PEI<sub>0.06</sub>)<sup>5,9</sup></b> | 10                   | 5900          | 1.35      | 6%                |
| <b>P(EtOx<sub>0.91</sub>-co-PEI<sub>0.09</sub>)<sup>6,9</sup></b> | 50                   | 6900          | 1.30      | 9%                |
| <b>P(EtOx<sub>0.88</sub>-co-PEI<sub>0.12</sub>)<sup>7</sup></b>   | 100                  | 7000          | 1.29      | 12%               |

|                                                     |     |       |      |     |
|-----------------------------------------------------|-----|-------|------|-----|
| $P(\text{EtOx}_{0.78}\text{-co-PEI}_{0.22})^{7.3}$  | 200 | 7300  | 1.27 | 22% |
| $P(\text{EtOx}_{0.97}\text{-co-PEI}_{0.03})^{15.2}$ | 50  | 15200 | 1.12 | 3%  |
| $P(\text{EtOx}_{0.93}\text{-co-PEI}_{0.07})^{15.4}$ | 100 | 15400 | 1.11 | 7%  |
| $P(\text{EtOx}_{0.85}\text{-co-PEI}_{0.15})^{14.4}$ | 200 | 14400 | 1.18 | 15% |
| $P(\text{EtOx}_{0.97}\text{-co-PEI}_{0.03})^{21.6}$ | 50  | 21600 | 1.08 | 3%  |
| $P(\text{EtOx}_{0.93}\text{-co-PEI}_{0.07})^{18.3}$ | 100 | 18300 | 1.20 | 7%  |
| $P(\text{EtOx}_{0.87}\text{-co-PEI}_{0.13})^{19.3}$ | 200 | 19300 | 1.17 | 13% |

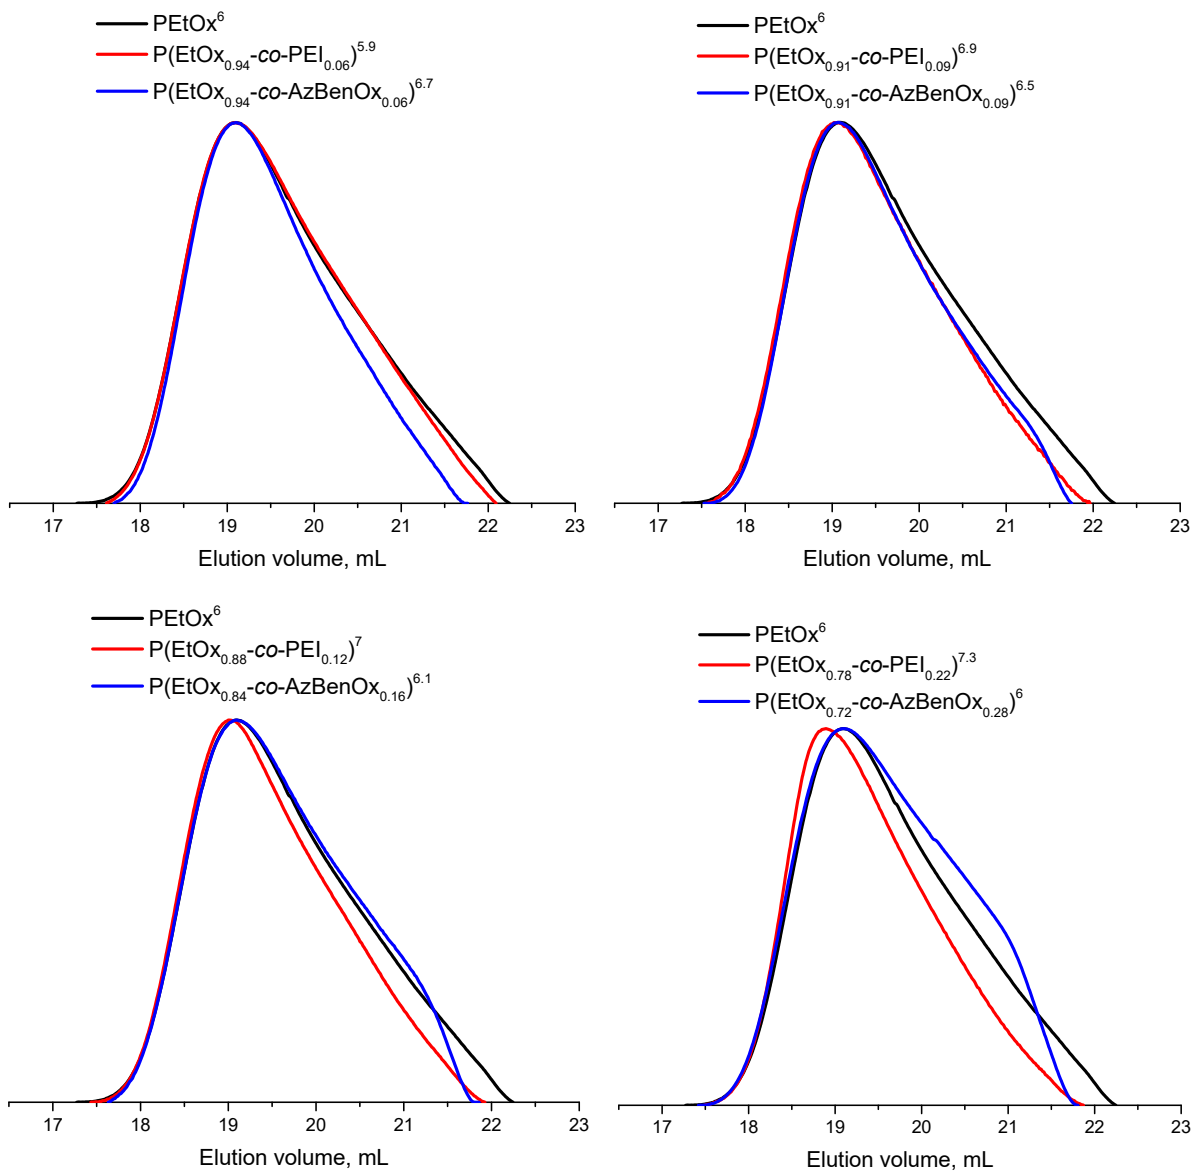

**Figure S1.** SEC (DMAc / LiCl) – Elugrams of  $PEtOx^6$  series: initial  $PEtOx$ 's (black), hydrolyzed polymers  $P(EtOx_x-co-PEI_y)$  (red), and modified polymers  $P(EtOx_x-co-AzBenOx_y)$  (blue).

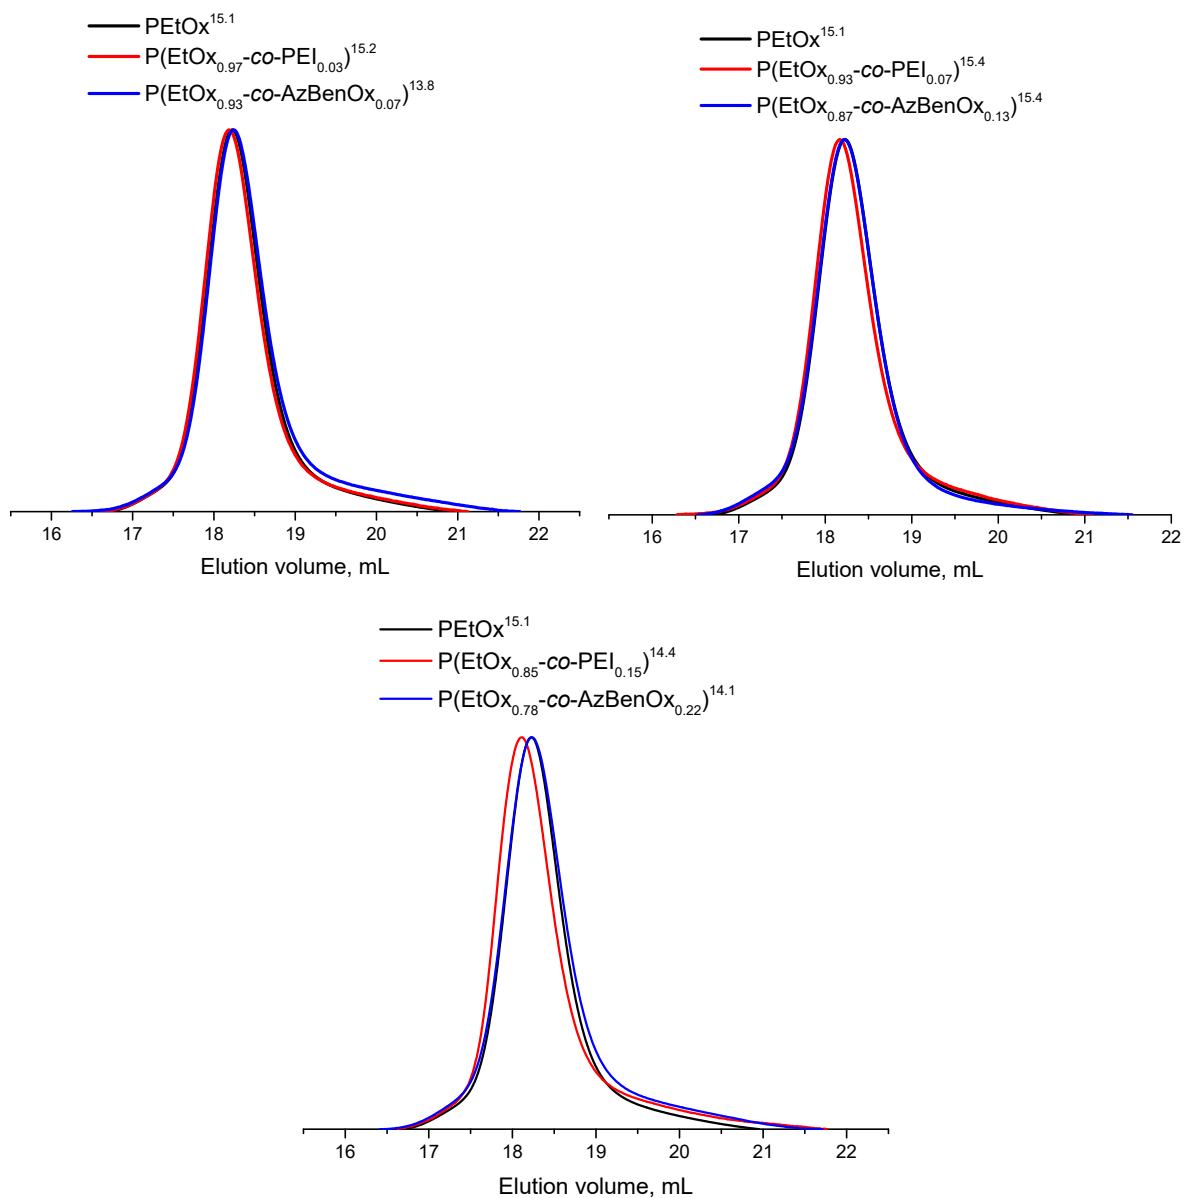

**Figure S2.** SEC (DMAc / LiCl) – Elugrams of  $PEtOx^{15.1}$  series: initial  $PEtOx$ 's (black), hydrolyzed polymers  $P(EtOx_x-co-PEI_y)$  (red), and modified polymers  $P(EtOx_x-co-AzBenOx_y)$  (blue).

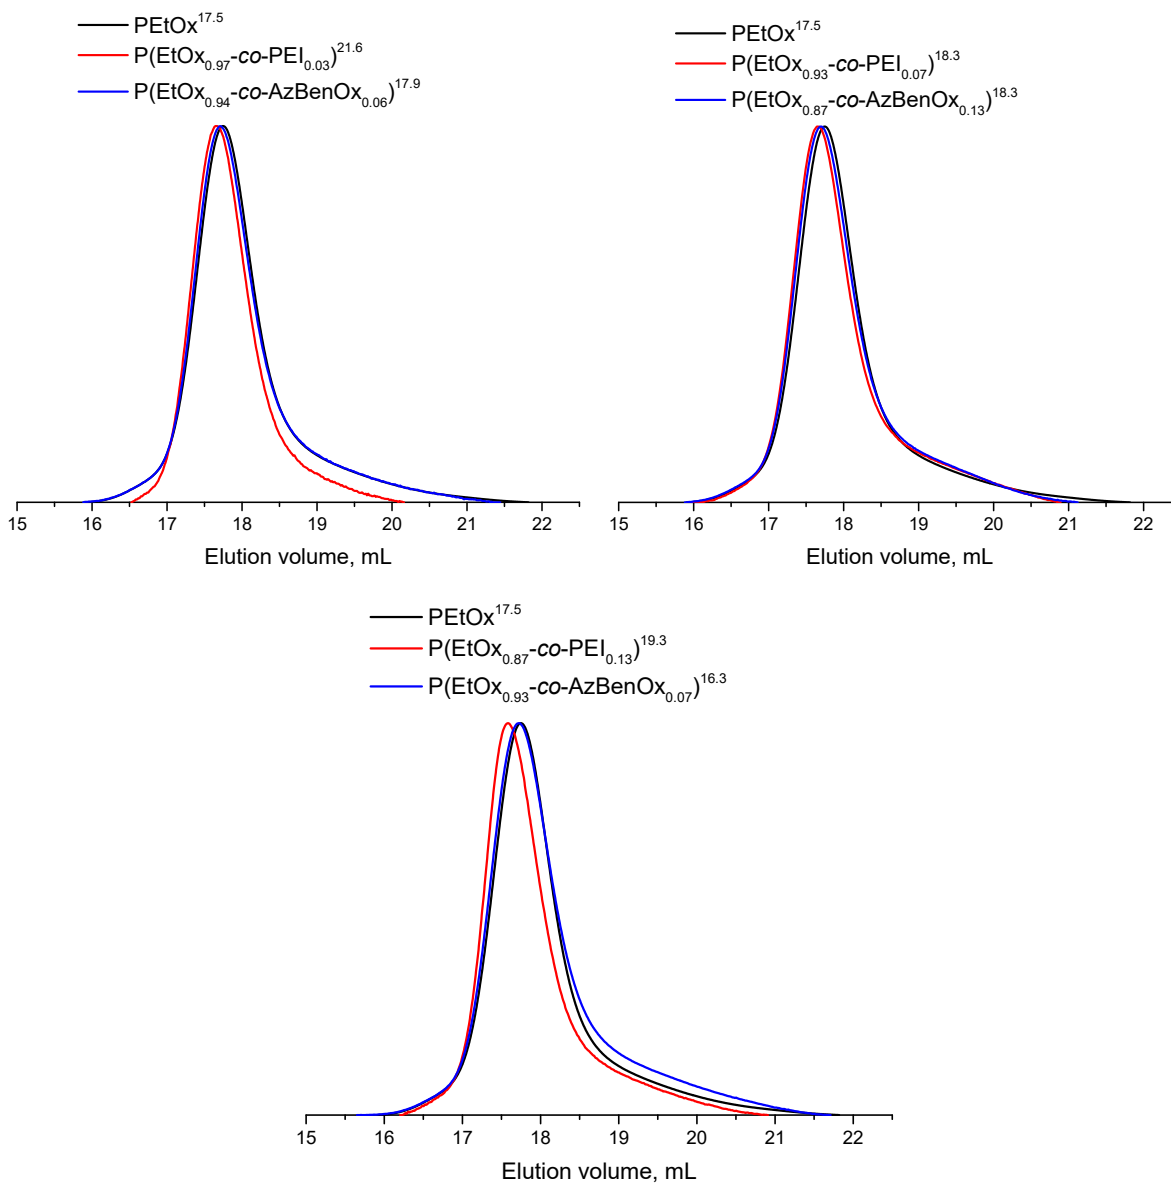

**Figure S3.** SEC (DMAc / LiCl) – Elugrams of PEtOx<sup>17.5</sup> series: initial PEtOx's (black), hydrolyzed polymers P(EtOx<sub>x</sub>-co-PEI<sub>y</sub>) (red), and modified polymers P(EtOx<sub>x</sub>-co-AzBenOx<sub>y</sub>) (blue).

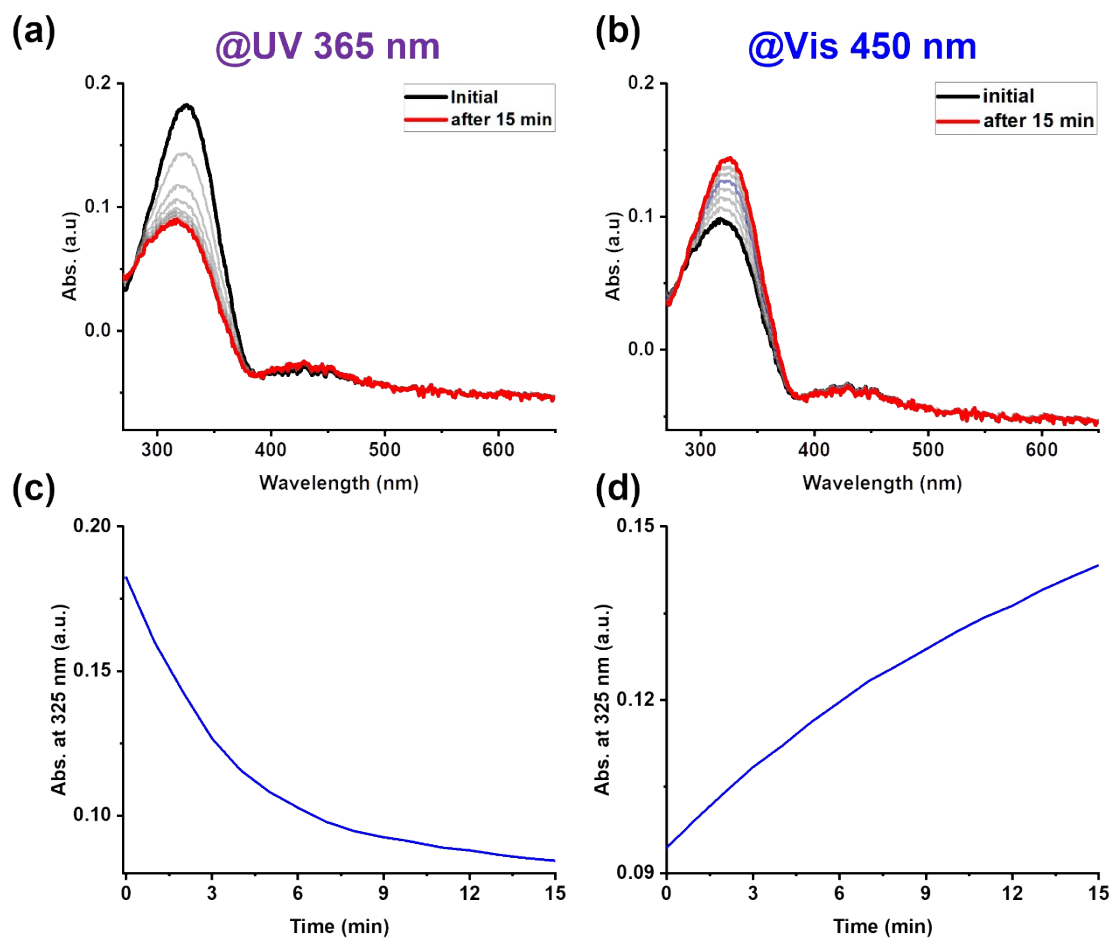

**Figure S4.** UV/Vis spectroscopy results of  $P(\text{EtOx}_{0.91}\text{-co-AzBenOx}_{0.09})^{6.4}$ , 0.02 mg/mL in water at 45°C. Arrows indicate from the beginning to the end of the corresponding light irradiation.

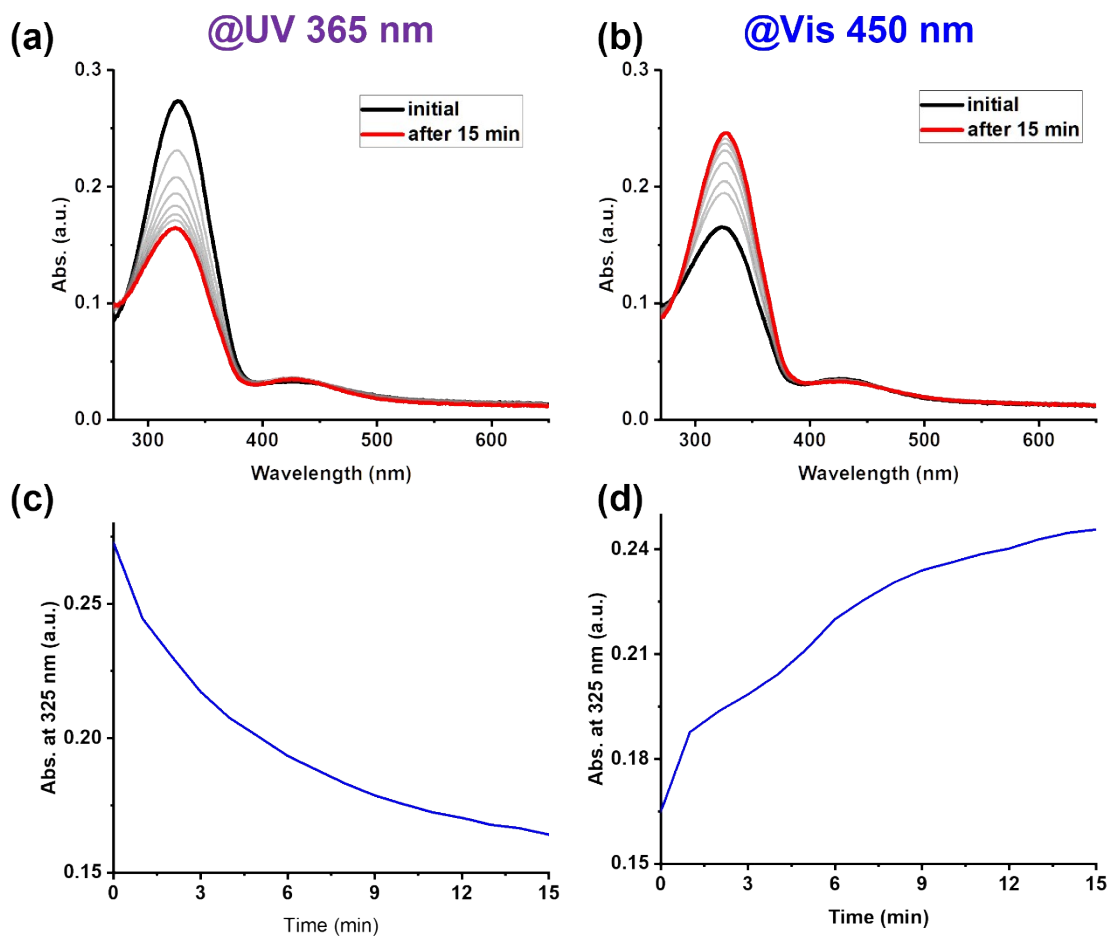

**Figure S5.** UV/Vis spectroscopy results of  $P(\text{EtOx}_{0.84}\text{-co-AzBenOx}_{0.16})_{6.1}$ , 0.02 mg/mL in water at room temperature. Arrows indicate from the beginning to the end of the corresponding light irradiation.

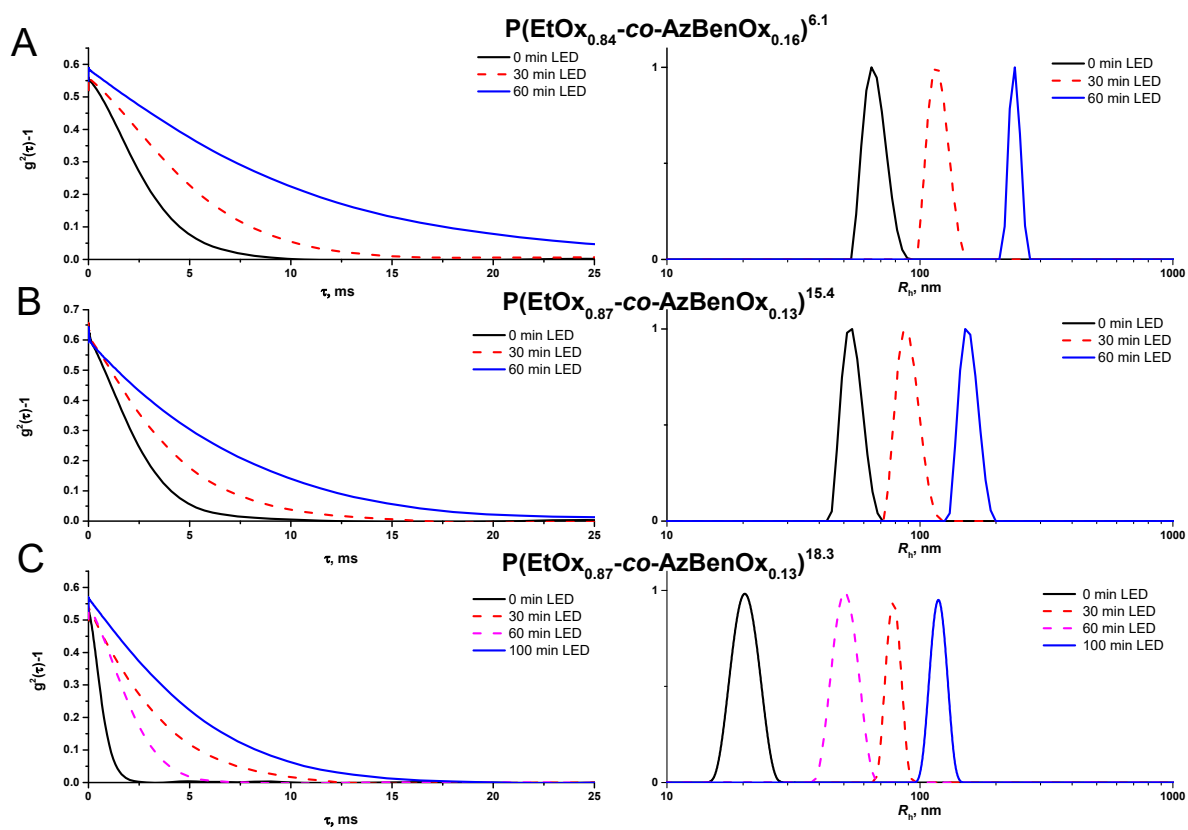

**Figure S6.** Autocorrelation functions and respective CONTIN plots for micellar nanoparticles in aqueous solution under different irradiation times (365 nm, LED).
